# Supplementary material
Source: PubMed Central journal article supplement (PMC4943390)
Supplement: supp_the2015-0480_Supplemental_Figure.pdf [file supp_the2015-0480_Supplemental_Figure.pdf]

Supplemental Figure for:  
Tamoxifen Dose Escalation in Patients with Diminished CYP2D6 Activity Normalizes Endoxifen Concentrations without Increasing Toxicity  
Daniel L Hertz et al.

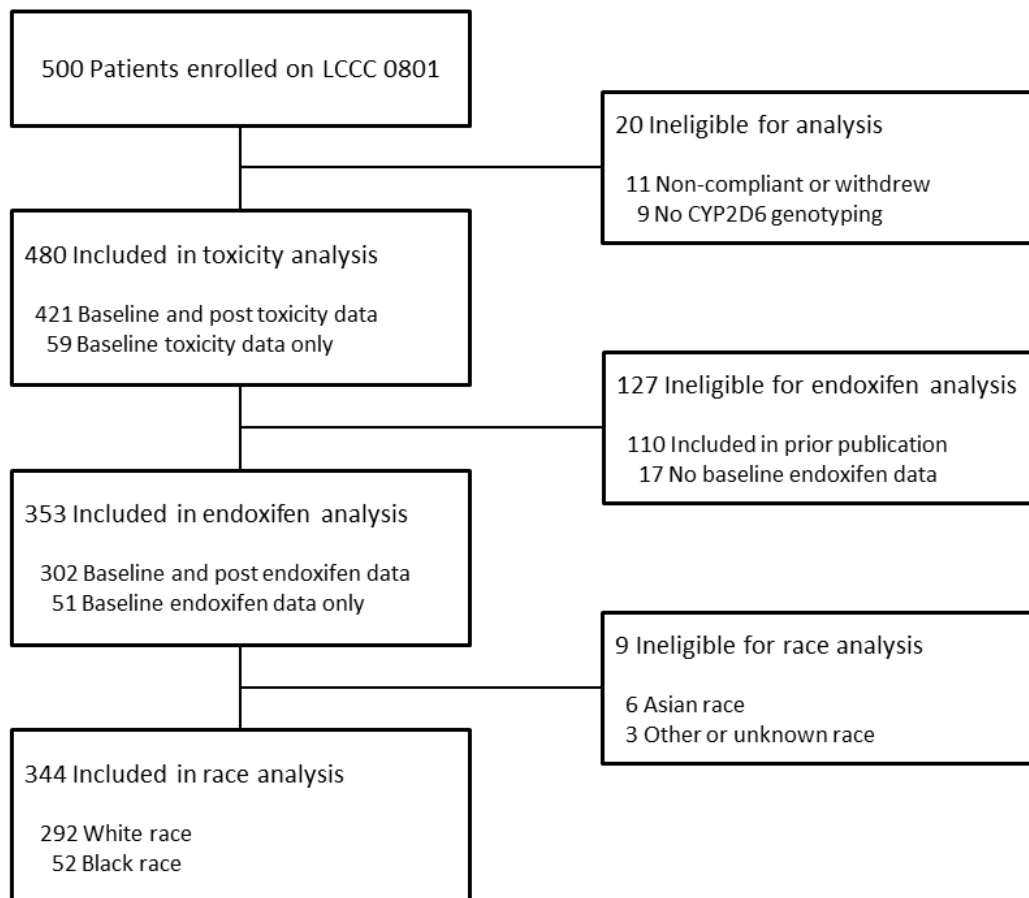

**Figure S1: Consort diagram describing subject disposition on LCCC0801.** A total of 500 patients enrolled on the LCCC0801 clinical trial. The toxicity analysis included 480 patients from both phases of the clinical trial. Endoxifen analysis included only patients from phase II, 353 total were included in the overall analysis and 344 in the comparison between white and black patients.
